# Supplementary material for: Simultaneous and independent tuning of RhoA and Rac1 activity with orthogonally inducible promoters
Source: Royal Society of Chemistry journal article supplement (doi:10.1039/c4ib00099d), 2014-07-15
Supplement: c4ib00099d7.pdf [file c4ib00099d7.pdf]

### **Supplementary Movie Legends**

**Supplementary Movie 1.** RhoRac cells cultured on 1 mg/ml collagen gels without doxycycline or cumate. Scalebar = 100  $\mu\text{m}$ .

**Supplementary Movie 2.** RhoRac cells cultured on 1 mg/ml collagen gels with 25 ng/ml doxycycline. Scalebar = 100  $\mu\text{m}$ .

**Supplementary Movie 3.** RhoRac cells cultured on 1 mg/ml collagen gels with 25  $\mu\text{g/ml}$  cumate. Scalebar = 100  $\mu\text{m}$ .

**Supplementary Movie 4.** RhoRac cells cultured on 1 mg/ml collagen gels with 25 ng/ml doxycycline and 25  $\mu\text{g/ml}$  cumate. Scalebar = 100  $\mu\text{m}$ .

**Supplementary Movie 5.** RhoRac cells cultured on 1 mg/ml collagen gels first with 25 ng/ml doxycycline and then switched to 25  $\mu\text{g/ml}$  cumate after  $t = 0$ . Scalebar = 100  $\mu\text{m}$ .

**Supplementary Movie 6.** RhoRac cells cultured on 1 mg/ml collagen gels first with 25  $\mu\text{g/ml}$  cumate and then switched to 25 ng/ml doxycycline after  $t = 0$ . Scalebar = 100  $\mu\text{m}$ .
